# Supplementary material for: Plasmid Complement of Lactococcus lactis NCDO712 Reveals a Novel Pilus Gene Cluster
Source: PubMed Central journal article supplement (PMC5152845; doi:10.1371/journal.pone.0167970), 2016-12-12
Supplement: pone.0167970.s003.pdf [file pone.0167970.s003.pdf]

**S1 Table. Oligonucleotides used in this study**

| A) To identify <i>L. lactis</i> NCDO712 plasmids (34) |                                                        |
|-------------------------------------------------------|--------------------------------------------------------|
| pLP712_FW                                             | GCTTTAATGGCTGCTCCATC                                   |
| pLP712_RV                                             | AGCACACCCGGATGATAGTC                                   |
| pSH73_FW                                              | TTTCAGTAGAAGGCCAAACAAC                                 |
| pSH73_RV                                              | TGCAAATTTATCTACAAAGGCTTG                               |
| pSH72_FW                                              | GCTTTTTCGTTGGTTTGCTC                                   |
| pSH72_RV                                              | GCCCAAAATAGTGGGTTAGTG                                  |
| pSH71_FW                                              | TTGGGATAGAGCGTTTTTGG                                   |
| pSH71_RV                                              | CGGGGGAAATAAAATGACAAAC                                 |
| pSH74_FW                                              | GGACCAGATGGTACTTTTGAAGCG                               |
| pLSH74_RV                                             | GGTAAAGTCACTATTGATGGACAGCC                             |
| pNZ712_FW                                             | CACTCTAGTTTCCTACCTTCGTTGCAAGC                          |
| pNZ712_RV                                             | CCAGTGCTAATCCTCCGTATAAGTATAGC                          |
| B) For pilin operon cloning                           |                                                        |
| pilin <i>PstI</i> forw*                               | CCGctgcagTTTGCAACAGAACCGTAATTGATTAGC                   |
| pilin <i>XhoI</i> rev*                                | CGGctcgagTTAAGTAATTTGAATTACTTGCTTTGAGAGTTGT<br>TTAAAGG |

\*Indicated restriction enzyme sites are shown in lower case letters in the oligonucleotide sequence.
