# Supplementary material for: Plasmid Complement of Lactococcus lactis NCDO712 Reveals a Novel Pilus Gene Cluster
Source: PubMed Central journal article supplement (PMC5152845; doi:10.1371/journal.pone.0167970), 2016-12-12
Supplement: pone.0167970.s004.pdf [file pone.0167970.s004.pdf]

**S2 Table. Single nucleotide polymorphisms between the chromosomes of *L. lactis* NCDO712 and its plasmids-free derivative MG1363 (72).**

| Predicted mutations   |          |                         |                                            |                                                                |                                                                                                                     |
|-----------------------|----------|-------------------------|--------------------------------------------|----------------------------------------------------------------|---------------------------------------------------------------------------------------------------------------------|
| Position <sup>§</sup> | Mutation | Annotation <sup>*</sup> | Gene                                       | Description                                                    | SNP type <sup>#</sup>                                                                                               |
| 26455                 | T→C      | Intergenic (+111/-39)   | <i>llmg_tRNA_07</i> →<br>/ → <i>mtlA</i>   | tRNA-Asn/PTS system mannitol-specific transporter subunit IIBC | Intergenic, predicted to change promoter at position -39; the -10 box is altered from an optimal TATAAT into TACAAT |
| 522850                | G→T      | S214S (TCG→TCT)         | <i>glpT</i> →                              | glycerol-3-phosphatase transporter                             | Synonymous                                                                                                          |
| 668056                | A→C      | D155E (GAT→GAG)         | <i>tnp1297</i> ←                           | transposase for insertion sequence element IS1297              | Non-synonymous; SIFT score - 1                                                                                      |
| 671366                | G→T      | Q2K (CAA→AAA)           | <i>llmg_0678</i> ←                         | transposase helper protein for IS981                           | Non-synonymous; SIFT score - 1                                                                                      |
| 671428                | T→C      | intergenic (-59/-71)    | <i>llmg_0678</i> ← / →<br><i>llmg_0679</i> | transposase helper protein for IS981/hypothetical protein      | Intergenic                                                                                                          |
| 1167414               | T→G      | Intergenic (+64/-55)    | <i>llmg_1198</i> → / →<br><i>llmg_1200</i> | hypothetical protein/hypothetical protein                      | Intergenic                                                                                                          |
| 1272351               | C→T      | L84L (TTG→TTA)          | <i>llmg_1303</i> ←                         | hypothetical protein                                           | Synonymous                                                                                                          |
| 1529872               | A→C      | I36M (ATT→ATG)          | <i>llmg_1557</i> ←                         | hypothetical protein                                           | Non-synonymous; SIFT score - 0.79                                                                                   |
| 2143208               | T→G      | S244S (TCT→TCG)         | <i>tnp904</i> →                            | transposase for insertion sequence element IS904I              | Synonymous                                                                                                          |
| 2380149               | C→T      | G118D (GGC→GAC)         | <i>tsf</i> ←                               | elongation factor Ts                                           | Non-synonymous; predicted to affect protein function; SIFT score - 0.01                                             |
| 2492669               | A→C      | V284G (GTT→GGT)         | <i>gapB</i> ←                              | glyceraldehyde 3-phosphate dehydrogenase                       | Non-synonymous; predicted to affect protein function; SIFT score - 0.02                                             |

<sup>§</sup> Indicates nucleotide position in the genome sequence of *L. lactis* MG1363 (RefSeq: [NC\\_009004.1](#))

<sup>\*</sup> For mutations in intergenic regions the numbers indicates the relative position to the neighboring genes. For mutations in genes the amino acid (top) and nucleotide (bottom) changes are given.

<sup>#</sup> The amino acid substitution is predicted to be deleterious if the SIFT score is ≤ 0.05, and tolerated if the SIFT score is > 0.05. If intergenic mutations effect either the -10 or -35 box of the promoter it is indicated
