# Supplementary material for: Plasmid Complement of Lactococcus lactis NCDO712 Reveals a Novel Pilus Gene Cluster
Source: PubMed Central journal article supplement (PMC5152845; doi:10.1371/journal.pone.0167970), 2016-12-12
Supplement: pone.0167970.s005.pdf [file pone.0167970.s005.pdf]

**S3 Table. Main plasmid genes and features.**

| <b>Plasmid</b> | <b>Genes</b>                                                                                                                                                      | <b>Product/Function</b>                                            |
|----------------|-------------------------------------------------------------------------------------------------------------------------------------------------------------------|--------------------------------------------------------------------|
| pLP712         | <i>priP</i>                                                                                                                                                       | subtilisin-like serine protease                                    |
|                | <i>priM</i>                                                                                                                                                       | peptidyl-prolyl isomerase                                          |
|                | <i>dld</i>                                                                                                                                                        | D-lactate dehydrogenase                                            |
|                | <i>lacR-lacABCDFEGX</i>                                                                                                                                           | Enzymes involved in lactose degradation                            |
|                | <i>pepF</i>                                                                                                                                                       | Oligoendopeptidase F                                               |
|                | <i>parAB</i>                                                                                                                                                      | Plasmid partitioning proteins                                      |
|                | <i>rep</i>                                                                                                                                                        | Replication protein                                                |
| pSH71          | <i>repABC</i>                                                                                                                                                     | Replication proteins                                               |
| pSH72          | <i>repBXC</i>                                                                                                                                                     | Replication proteins                                               |
| pSH73          | <i>hsdS</i>                                                                                                                                                       | Type I R/M system specificity subunit                              |
|                | <i>repXB</i>                                                                                                                                                      | Replication-associated protein RepX, RepB                          |
|                | <i>cadC, cadA</i>                                                                                                                                                 | Resistance to heavy metals (cadmium), cadmium efflux ATPase (CadA) |
| pSH74          | <i>IS1216</i>                                                                                                                                                     | 1 IS element                                                       |
|                | <i>spaCB, spaA, srtC1, srtC2</i>                                                                                                                                  | Pilin gene cluster                                                 |
|                | <i>repB, repX</i>                                                                                                                                                 | Replication proteins                                               |
|                | <i>hsdS</i>                                                                                                                                                       | Type I R/M system, specificity subunit                             |
|                |                                                                                                                                                                   |                                                                    |
| pNZ712         | <i>nisCIP</i>                                                                                                                                                     | Nisin immunity                                                     |
|                | <i>lcoRSABC</i>                                                                                                                                                   | Copper resistance                                                  |
|                | <i>mobD, mobC</i>                                                                                                                                                 | Relaxase/mobilisation nuclease MobD and mobilization protein MobC  |
|                | <i>repB, repX, repA</i>                                                                                                                                           | Replication proteins                                               |
|                | <i>parA</i>                                                                                                                                                       | Plasmid partitioning protein ParA                                  |
|                | <i>mntH</i>                                                                                                                                                       | Mn <sup>2+</sup> /Fe <sup>2+</sup> transporter, NRAMP family       |
|                | five <i>ISS1</i> , three <i>IS981</i> , three <i>ISLL6</i> , two <i>IS1076/IS1069/IS1068/IS904</i> , <i>IS1251</i> , <i>IS712</i> , <i>IS1216</i> , <i>IS6770</i> | 17 IS elements                                                     |
