# Supplementary material for: Plasmid Complement of Lactococcus lactis NCDO712 Reveals a Novel Pilus Gene Cluster
Source: PubMed Central journal article supplement (PMC5152845; doi:10.1371/journal.pone.0167970), 2016-12-12
Supplement: pone.0167970.s006.pdf [file pone.0167970.s006.pdf]

**S4 Table. The main alignment results of pNZ712 and pSH74 to known lactococcal plasmids.**

| NCDO712 plasmid | Position                       | Alignmet with plasmid                                                                                                 | Position                  | Sequence identity in %/SNPs  | Annotation                                         |
|-----------------|--------------------------------|-----------------------------------------------------------------------------------------------------------------------|---------------------------|------------------------------|----------------------------------------------------|
| pNZ712          | 12054...21871;<br>1868...22735 | pND306 (accession NG_035558.1) of <i>L. lactis</i> subsp. <i>lactis</i> 1252D (93)                                    | 1...9818;<br>9782...10650 | 99%, 3 SNPs,<br>1 gap        | Copper resistance associated <i>lcoRSABC</i> genes |
|                 | 12444...18177                  | pSK11P (accession NC_017500.1 and <a href="#">NC_008505.1</a> ) from <i>L. lactis</i> subsp. <i>cremoris</i> SK11 (8) | 49965...55679             | 99%, 19 gaps<br>and 8 SNP    | <i>lcoRSA</i> genes                                |
|                 | 46793...49826                  | pAH82 (accession AF243383)                                                                                            | 7830...4798               | 99%, 3 gaps<br>and 17 SNPs   | CDS of unknown function                            |
|                 | 25241...32960                  | pMRC01 from <i>L. lactis</i> DPC3147                                                                                  | 45635...53355             | 99%, 3 gaps<br>and 20 SNPs   | Hypothetical and putative proteins                 |
|                 | 44946...48234                  | pNP40 (accession DQ534432, AY530537)                                                                                  | 61337...58037             | 93%, 50 gaps<br>and 170 SNPs | <i>mobD</i>                                        |
| pSH74           | 6395...6959                    | pKP1 (accession NC_016042.1)                                                                                          | 8427...8991               | 99%, 6 SNPs                  | Transposase <i>IS1216</i>                          |
|                 | 6398... 6959                   | pK214 (accession NC_009751.1) from <i>L. lactis</i> K214                                                              | 29824...29263             | 99%, 6 SNPs                  | <i>tmpA</i>                                        |
|                 | 6395...6959                    | pSK11B (accession NC_013551)                                                                                          | 9605...9044               | 99%, 6 SNPs                  | <i>tmp1-IS6</i>                                    |
|                 | 4793...5487                    | pCV56A (accession NC_017483.1) from <i>L. lactis</i> CV56                                                             | 8618...9312               | 99%, 10 SNPs                 | Acetyltransferase                                  |
|                 | 6398...6959                    | pIBB-JZK (accession NC_024965.1) of <i>L. lactis</i> ILIBB-JZK                                                        | 8369...7808               | 99%, 4 SNPs                  | Transposase <i>IS1216</i>                          |
|                 | 5564...6310                    | pGdh442 (accession NC_009435) of <i>L. lactis</i> NCDO1867                                                            | 33352...32607             | 98%, 13<br>SNPs, 3 gaps      | Transposases <i>tmpR</i>                           |
|                 | 5563...6275                    | pCIS5 (accession NC_019432) from <i>L. lactis</i> UC509.9                                                             | 7678...8390               | 99%, 8 SNPS                  | Resolvase/integrase                                |
