# Supplementary material for: Plasmid Complement of Lactococcus lactis NCDO712 Reveals a Novel Pilus Gene Cluster
Source: PubMed Central journal article supplement (PMC5152845; doi:10.1371/journal.pone.0167970), 2016-12-12
Supplement: pone.0167970.s007.pdf [file pone.0167970.s007.pdf]

| Strains                                               | HT29<br>(% attachment) | Caco-2<br>(% attachment) |
|-------------------------------------------------------|------------------------|--------------------------|
| <i>Lb. rhamnosus</i> LGG                              | 2.3±0.7                | 1.2±0.8                  |
| Lactococcus lactis NCDO712                            | 0.3±0.2                | 2.4±2.2                  |
| <i>Lactococcus lactis</i> NCDO712(pIL253 <i>pil</i> ) | 0.06±0.06              | 0.04±0.01                |
| Lactococcus lactis MG1363pIL253                       | 0.5±0.05               | 0.8±0.7                  |
| Lactococcus lactis MG1363(pIL253 <i>pil</i> )         | 0.2±0.1                | 0.3±0.3                  |
| Lactococcus lactis MG1363                             | 1.8±0.5                | 2.8±0.2                  |
| Lactococcus lactis MG1299                             | 0.6±0.1                | 2.1±0.4                  |
| Lactococcus lactis MG1063                             | 0.5±0.2                | 2.5±1                    |
| Lactococcus lactis MG1365                             | 0.9±0.5                | 2.5±0.8                  |
