# Supplementary material for: Plasmid Complement of Lactococcus lactis NCDO712 Reveals a Novel Pilus Gene Cluster
Source: PubMed Central journal article supplement (PMC5152845; doi:10.1371/journal.pone.0167970), 2016-12-12
Supplement: pone.0167970.s008.pdf [file pone.0167970.s008.pdf]

**S 6 Table. Effect of the pilus gene cluster on conjugation of the lactose-fermenting ability to *L. lactis* MG1614.**

| Experiment #                 | Strain  | Transconjugants per donor |                                     | Fold increased conjugation efficiency |
|------------------------------|---------|---------------------------|-------------------------------------|---------------------------------------|
|                              |         | Wild type strain          | Strain harbouring pIL253 <i>pil</i> |                                       |
| 1                            | NCDO712 | 1.90E-07                  | 2.50E-06                            | 13.16                                 |
| 2                            | NCDO712 | 1.40E-07                  | 6.00E-06                            | 42.86                                 |
| 3                            | NCDO712 | 5.00E-08                  | 4.60E-07                            | 9.20                                  |
| <b>Average fold increase</b> |         |                           |                                     | <b>21.74</b>                          |

| Experiment #                 | Strain | Transconjugants per donor |                                     | Fold increased conjugation efficiency |
|------------------------------|--------|---------------------------|-------------------------------------|---------------------------------------|
|                              |        | Wild type strain          | Strain harbouring pIL253 <i>pil</i> |                                       |
| 1                            | MG1299 | 3.10E-07                  | 1.60E-06                            | 5.16                                  |
| 2                            | MG1299 | 1.50E-07                  | 9.30E-07                            | 6.20                                  |
| 3                            | MG1299 | 5.30E-08                  | 1.90E-06                            | 35.85                                 |
| <b>Average fold increase</b> |        |                           |                                     | <b>15.74</b>                          |
